# Supplementary material for: A COVID-19 Silver Lining—Decline in Antibiotic Resistance in Ischemic Leg Ulcers during the Pandemic: A 6-Year Retrospective Study from a Regional Tertiary Hospital (2017–2022)
Source: MDPI journal article supplement (doi:10.3390/antibiotics13010035), 2023-12-29
Supplement: s1 [file s1]

## Supplementary Table S1

List of antibiotics and their respective classes against which gram-positive and gram-negative bacteria were tested for resistance in our study.

| Antibiotic class | Antibiotics                                | Gram-positive | Gram-negative |
|------------------|--------------------------------------------|---------------|---------------|
| Aminoglycosides  | Gentamicin                                 | ✓             | ✓             |
|                  | Amikacin                                   | ×             | ✓             |
| Cephalosporins   | Cefotaxime                                 | ×             | ✓             |
|                  | Ceftriaxone                                | ×             | ✓             |
|                  | Cefepime                                   | ×             | ✓             |
|                  | Ceftazidime                                | ×             | ✓             |
| Fluoroquinolones | Ciprofloxacin                              | ✓             | ✓             |
|                  | Levofloxacin                               | ✓             | ✓             |
|                  | Moxifloxacin                               | ✓             | ×             |
| Macrolides       | Erythromycin                               | ✓             | ×             |
| Penicillins      | Penicillin G                               | ✓             | ×             |
|                  | Amoxicillin                                | ×             | ✓             |
|                  | Ampicillin                                 | ✓             | ✓             |
|                  | Oxacillin                                  | ✓             | ×             |
|                  | Piperacillin/tazobactam <sup>A</sup>       | ×             | ✓             |
| Other            | Clindamycin                                | ✓             | ×             |
|                  | Fusidic acid                               | ✓             | ×             |
|                  | Trimethoprim/sulfamethoxazole <sup>A</sup> | ✓             | ✓             |
|                  | Vancomycin                                 | ✓             | ×             |
|                  | Carbapenems                                | ×             | ✓             |

<sup>A</sup> Antibiotics used in combination due to their synergistic effect.

## Supplementary Table S2

Antibiotic resistance and susceptibility of gram-positive bacteria isolated from leg ulcers in patients admitted to hospital with CLTI over the six-year study period (2017–2022).

| Pathogens n (%)                                                                                      | Overall     |             | Oxacillin   |             | Ampicillin  |            | Fusidic acid |           | Clindamycin |             | Erythromycin |             | Trimethoprim / Sulfamethoxazole <sup>A</sup> |             | Penicillin  |            | Aminoglycoside |            | Fluoroquinolones |            | Vancomycin   |           |
|------------------------------------------------------------------------------------------------------|-------------|-------------|-------------|-------------|-------------|------------|--------------|-----------|-------------|-------------|--------------|-------------|----------------------------------------------|-------------|-------------|------------|----------------|------------|------------------|------------|--------------|-----------|
|                                                                                                      | S           | R           | S           | R           | S           | R          | S            | R         | S           | R           | S            | R           | S                                            | R           | S           | R          | S              | R          | S                | R          | S            | R         |
| <i>Staphylococcus aureus</i><br>(n=19; 40%)                                                          | 16<br>(85%) | 3<br>(16%)  | 18<br>(95%) | 1<br>(5%)   | ND          |            | 18<br>(95%)  | 1<br>(5%) | 17<br>(89%) | 2<br>(11%)  | 17<br>(89%)  | 2<br>(11%)  | 18<br>(95%)                                  | 1<br>(5%)   | ND          |            | 19<br>(100%)   | –          | 19<br>(100%)     | –          | 19<br>(100%) | –         |
| <i>Enterococcus</i> spp. ( <i>E. faecalis</i> , <i>E. faecium</i> , <i>E. avium</i> )<br>(n=17; 36%) | 11<br>(66%) | 6<br>(35%)  | ND          |             | 15<br>(88%) | 2<br>(12%) | ND           |           | ND          |             | ND           |             | ND                                           |             | 15<br>(88%) | 2<br>(12%) | 13<br>(76%)    | 4<br>(24%) | 17<br>(100%)     | –          | 16<br>(94%)  | 1<br>(6%) |
| $\beta$ - hemolytic Streptococci<br>(n=7; 15%)                                                       | 7<br>(100%) | –           | ND          |             | 7<br>(100%) | –          | ND           |           | 7<br>(100%) | –           | 7<br>(100%)  | –           | ND                                           |             | 7<br>(100%) | –          | 7<br>(100%)    | –          | 7<br>(100%)      | –          | 7<br>(100%)  | –         |
| <i>Staphylococcus epidermidis</i><br>(n=2; 4%)                                                       | –           | 2<br>(100%) | –           | 2<br>(100%) | ND          |            | ND           |           | –           | 2<br>(100%) | –            | 2<br>(100%) | –                                            | 2<br>(100%) | ND          |            | 1<br>(50%)     | 1<br>(50%) | 1<br>(50%)       | 1<br>(50%) | 2<br>(100%)  | –         |
| $\alpha$ -hemolytic Streptococci<br>(n=1; 2%)                                                        | –           | 1<br>(100%) | ND          |             | ND          |            | ND           |           | –           | 1<br>(100%) | –            | 1<br>(100%) | ND                                           |             | ND          |            | ND             |            | ND               |            | 1<br>(100%)  | –         |
| <i>Staphylococcus haemolyticus</i><br>(n=1; 2%)                                                      | 1<br>(100%) | –           | 1<br>(100%) | –           | ND          |            | ND           |           | 1<br>(100%) | –           | 1<br>(100%)  | –           | 1<br>(100%)                                  | –           | ND          |            | 1<br>(100%)    | –          | 1<br>(100%)      | –          | 1<br>(100%)  | –         |
| Total<br>(n=47)                                                                                      | 35<br>(75%) | 12<br>(26%) | 19<br>(86%) | 3<br>(14%)  | 22<br>(92%) | 2<br>(8%)  | 18<br>(95%)  | 1<br>(5%) | 25<br>(83%) | 5<br>(17%)  | 25<br>(83%)  | 5<br>(17%)  | 19<br>(84%)                                  | 3<br>(16%)  | 22<br>(92%) | 2<br>(8%)  | 41<br>(89%)    | 5<br>(11%) | 45<br>(98%)      | 1<br>(2%)  | 46<br>(98%)  | 1<br>(2%) |

CLTI, chronic limb-threatening ischemia; ND, susceptibility testing was not performed; S, susceptible (in blue); R, resistant (in red).

Data within cells on the same row are *n* (%) for the number and proportion of isolated pathogens of a bacterial taxon tested against a particular antibiotic (columns).

<sup>A</sup> Antibiotics used in combination due to their synergistic effect.

## Supplementary Table S3

Antibiotic resistance and susceptibility of gram-negative bacteria isolated from leg ulcers in patients admitted to hospital with CLTI over the six-year study period (2017–2022).

| Bacterial taxa                                | Overall     |             | Carbapenems  |            | Cephalosporins |             | Piperacillin / Tazobactam <sup>A</sup> |            | Fluoroquinolones |             | Aminoglycosides |            | Ampicillin  |             | Amoxicillin / clavulanate <sup>A</sup> |             | Trimethoprim / Sulfamethoxazole <sup>A</sup> |             |
|-----------------------------------------------|-------------|-------------|--------------|------------|----------------|-------------|----------------------------------------|------------|------------------|-------------|-----------------|------------|-------------|-------------|----------------------------------------|-------------|----------------------------------------------|-------------|
|                                               | S           | R           | S            | R          | S              | R           | S                                      | R          | S                | R           | S               | R          | S           | R           | S                                      | R           | S                                            | R           |
| <i>Escherichia coli</i> (n=27; 15%)           | 4<br>(15%)  | 23<br>(85%) | 26<br>(96%)  | 1<br>(4%)  | 16<br>(59%)    | 11<br>(41%) | 26<br>(96%)                            | 1<br>(4%)  | 8<br>(30%)       | 19<br>(70%) | 23<br>(85%)     | 4<br>(15%) | 24<br>(88%) | 3<br>(11%)  | 25<br>(93%)                            | 2<br>(7%)   | 15<br>(56%)                                  | 12<br>(44%) |
| <i>Pseudomonas aeruginosa</i> (n=26; 15%)     | 24<br>(92%) | 2<br>(8%)   | 24<br>(92%)  | 2<br>(8%)  | 25<br>(96%)    | 1<br>(4%)   | 26<br>(100%)                           | –          | 25<br>(96%)      | 1<br>(4%)   | 25<br>(96%)     | 1<br>(4%)  | ND          |             | ND                                     |             | ND                                           |             |
| <i>Proteus mirabilis</i> (n=17; 10%)          | 8<br>(47%)  | 9<br>(53%)  | 17<br>(100%) | –          | 11<br>(65%)    | 6<br>(35%)  | 17<br>(100%)                           | –          | 10<br>(53%)      | 7<br>(47%)  | 15<br>(87%)     | 2<br>(12%) | 15<br>(87%) | 2<br>(12%)  | 15<br>(87%)                            | 2<br>(12%)  | 8<br>(47%)                                   | 9<br>(53%)  |
| <i>Citrobacter freundii</i> (n=16; 9%)        | 8<br>(50%)  | 8<br>(50%)  | 15<br>(94%)  | 1<br>(6%)  | 14<br>(88%)    | 2<br>(12%)  | 13<br>(81%)                            | 3<br>(19%) | 14<br>(88%)      | 2<br>(12%)  | 15<br>(94%)     | 1<br>(6%)  | ND          |             | 10<br>(63%)                            | 6<br>(37%)  | 12<br>(75%)                                  | 4<br>(25%)  |
| <i>Klebsiella pneumoniae</i> (n=15; 8%)       | 5<br>(33%)  | 10<br>(67%) | 14<br>(94%)  | 1<br>(7%)  | 9<br>(60%)     | 6<br>(40%)  | 13<br>(87%)                            | 2<br>(13%) | 6<br>(40%)       | 9<br>(60%)  | 15<br>(100%)    | –          | 14<br>(93%) | 1<br>(7%)   | 11<br>(73%)                            | 4<br>(27%)  | 6<br>(40%)                                   | 9<br>(60%)  |
| <i>Morganella morganii</i> (n=13; 7%)         | 2<br>(15%)  | 11<br>(85%) | 13<br>(100%) | –          | 11<br>(85%)    | 2<br>(15%)  | 13<br>(100%)                           | –          | 11<br>(85%)      | 2<br>(15%)  | 13<br>(100%)    | –          | 11<br>(85%) | 2<br>(15%)  | 3<br>(23%)                             | 10<br>(77%) | 12<br>(93%)                                  | 1<br>(7%)   |
| <i>Stenotrophomonas maltophilia</i> (n=9; 5%) | 6<br>(67%)  | 3<br>(33%)  | ND           |            | 8<br>(89%)     | 1<br>(11%)  | ND                                     |            | 7<br>(78%)       | 2<br>(22%)  | ND              |            | ND          |             | ND                                     |             | 9<br>(100%)                                  | –           |
| <i>Serratia marcescens</i> (n=8; 4%)          | 2<br>(25%)  | 6<br>(75%)  | 8<br>(100%)  | –          | 8<br>(100%)    | –           | 8<br>(100%)                            | –          | 8<br>(100%)      | –           | 8<br>(100%)     | –          | ND          |             | 2<br>(25%)                             | 6<br>(75%)  | 8<br>(100%)                                  | –           |
| <i>Proteus vulgaris</i> (n=7; 4%)             | 4<br>(57%)  | 3<br>(43%)  | 5<br>(71%)   | 2<br>(29%) | 6<br>(86%)     | 1<br>(14%)  | 7<br>(100%)                            | –          | 6<br>(86%)       | 1<br>(14%)  | 6<br>(86%)      | 1<br>(14%) | 6<br>(86%)  | 1<br>(14%)  | 7<br>(100%)                            | –           | 6<br>(86%)                                   | 1<br>(14%)  |
| <i>Enterobacter cloacae</i> (n=6; 3%)         | 3<br>(50%)  | 3<br>(50%)  | 6<br>(100%)  | –          | 6<br>(100%)    | –           | 6<br>(100%)                            | –          | 5<br>(83%)       | 1<br>(17%)  | 6<br>(100%)     | –          | ND          |             | 4<br>(67%)                             | 2<br>(33%)  | 5<br>(83%)                                   | 1<br>(17%)  |
| <i>Klebsiella oxytoca</i> (n=6; 3%)           | 4<br>(67%)  | 2<br>(33%)  | 6<br>(100%)  | –          | 5<br>(83%)     | 1<br>(17%)  | 6<br>(100%)                            | –          | 4<br>(67%)       | 2<br>(33%)  | 6<br>(100%)     | –          | ND          |             | 6<br>(100%)                            | –           | 5<br>(83%)                                   | 1<br>(17%)  |
| <i>Acinetobacter baumannii</i> (n=4; 2%)      | 2<br>(50%)  | 2<br>(50%)  | 2<br>(50%)   | 2<br>(50%) | 4<br>(100%)    | –           | 2<br>(50%)                             | 2<br>(50%) | 2<br>(50%)       | 2<br>(50%)  | 2<br>(50%)      | 2<br>(50%) | 3<br>(75%)  | 1<br>(25%)  | ND                                     |             | 4<br>(100%)                                  | –           |
| Nonfermenting gram negative bacilli (n=4; 2%) | 3<br>(75%)  | 1<br>(25%)  | 4<br>(100%)  | –          | 4<br>(100%)    | –           | 4<br>(100%)                            | –          | 3<br>(75%)       | 1<br>(25%)  | 3<br>(75%)      | 1<br>(25%) | ND          |             | ND                                     |             | 4<br>(100%)                                  | –           |
| Others (n=20; 11%) <sup>B</sup>               | 9<br>(40%)  | 11<br>(60%) | 18<br>(90%)  | 2<br>(10%) | 19<br>(95%)    | 1<br>(5%)   | 20<br>(100%)                           | –          | 16<br>(80%)      | 4<br>(20%)  | 18<br>(90%)     | 2<br>(10%) | 8<br>(89%)  | 1<br>(11%)  | 12<br>(63%)                            | 7<br>(37%)  | 19<br>(100%)                                 | –           |
| Total (n=178)                                 | 84<br>(47%) | 94<br>(53%) | 157<br>(93%) | 11<br>(7%) | 146<br>(82%)   | 32<br>(18%) | 161<br>(95%)                           | 8<br>(5%)  | 125<br>(70%)     | 53<br>(30%) | 155<br>(92%)    | 14<br>(8%) | 81<br>(88%) | 11<br>(12%) | 95<br>(71%)                            | 39<br>(29%) | 113<br>(75%)                                 | 38<br>(25%) |

CLTI, chronic limb-threatening ischemia; ND, susceptibility testing was not performed; S, susceptible (in blue); R, resistant (in red). Data within cells on the same row are n (%) for the number and proportion of isolated pathogens of a bacterial taxon tested against a particular antibiotic (columns). <sup>A</sup> Antibiotics used in combination due to their synergistic effect. <sup>B</sup> This group included bacteria with fewer than 3 isolates, namely *Achromobacter xylosoxidans*, *Acinetobacter johnsonii*, *Aeromonas hydrophila*, *Citrobacter koseri*, *Delftia acidovorans*, *Haemophilus parainfluenzae*, *Proteus penneri*, *Providencia rettgeri*, *Providencia stuartii*, and *Pseudomonas putida*.
